1 **Cohort profile: working age adults accessing**  
2 **secondary mental health services in South London**  
3 **(UK) and benefits – a data linkage of electronic**  
4 **mental health records and benefits data.**

5  
6 Ava Phillips [1], Ray Leal [1,2], Amelia Jewell [3], Ira Madan [5,6], Johnny Downs [1,3], Matthew  
7 Broadbent [3], Matthew Hotopf [1,3], Sarah Dorrington [1,3], \*Nicola T. Fear [1,2,4], \*Sharon A.M.  
8 Stevelink [1,2].

9  
10 \*joint last authors

- 11 1. Department of Psychological Medicine, Institute of Psychiatry, Psychology and Neuroscience,  
12 King's College London, London, UK.
- 13 2. King's Centre for Military Health Research, Department of Psychological Medicine, Institute of  
14 Psychiatry, Psychology and Neuroscience, King's College London, London, UK.
- 15 3. NIHR Maudsley Biomedical Research Centre, South London and Maudsley Mental Health  
16 NHS Trust, London, UK.
- 17 4. Academic Department of Military Mental Health, Department of Psychological Medicine,  
18 Institute of Psychiatry, Psychology and Neuroscience, King's College London, London, UK.
- 19 5. Department of Occupational Health, Guy's and St Thomas' Hospitals NHS Trust, London, UK.
- 20 6. King's College London, London, UK.

21  
22 Corresponding author: Ava Phillips, Institute of Psychiatry, Psychology and Neuroscience, King's  
23 College London, 16 De Crespigny Park, London, UK, SE5 9AF. Email: [ava.1.phillips@kcl.ac.uk](mailto:ava.1.phillips@kcl.ac.uk).

28 **Key words: linked data, benefits, administrative data, mental health records, secondary care,**  
29 **UK.**

## 30 **Abstract**

31 This study describes a cohort of working age adults from a novel data linkage. The  
32 data linkage is comprised of routine electronic mental health records from The South  
33 London and Maudsley (SLaM) NHS Foundation Trust and benefits records from The  
34 Department for Work and Pensions (DWP). The data linkage spans 15 years, with  
35 SLaM data covering the period 2007-2019 and DWP data covering the period 2005-  
36 2020. The linkage was established to investigate the interrelationships between  
37 benefit receipt and mental health (including mental health service utilisation) in  
38 patients accessing secondary mental health services in South London, UK. Clinical  
39 data from SLaM includes information on sociodemographics, diagnoses,  
40 assessments, treatments, interventions, and service interaction. Benefits data from  
41 DWP provides information on benefit types received, spell dates and entitlement  
42 amounts, work capability assessments and work programme access.

43 This cohort included all working age adults (aged 18-65 years) referred to/receiving  
44 treatment from SLaM services between January 2007 and June 2019. We report the  
45 sociodemographics and psychiatric diagnoses of n=150,348 working age adults, as  
46 well as the types of benefits received. We showed that 78.3% of working age adults  
47 received a benefit relating to unemployment or work-related income, sickness or  
48 disability, or a housing benefit, and that 68.0% of this group had a recorded primary  
49 psychiatric diagnosis. The most commonly received diagnoses were alcohol related  
50 disorders and substance related disorders (17.2%), followed by mood (affective)  
51 disorders (16.5%). We also observed that nearly 70% of claimants who had received

52 more than one benefit were residing in the two most deprived areas across the  
53 South London boroughs covered by SLaM.

54

## 55 **Introduction**

56

57 In the UK, mental disorders are one of the most frequently reported working age  
58 disabilities and/or health conditions and reasons for claiming government  
59 unemployment, work-related income, sickness, and disability related benefits [1]. It  
60 was reported in a health and disability green paper by the Department for Work and  
61 Pensions (DWP) that spending on benefits for people with disabilities and people  
62 with long-term health conditions is at its highest, with over £30 billion being spent in  
63 2019/20 on working age health and disability benefits [2]. This is predicted to  
64 increase to £31 - 40 billion by 2025/26.

65

66 In the UK, the Department for Work and Pensions (DWP) provides social security for  
67 those in need, known as “benefits”. Different types of benefits are provided  
68 depending on people’s needs and circumstances e.g., unemployment benefits for  
69 people who are out of work, benefits for those on a low income, or sickness and  
70 disability benefits for people with a disability, long-term illness, or mental disorder  
71 [3]. The standard entitlement amounts for each benefit differ and are also dependent  
72 on people’s circumstances such as their income, whom they live with, if they are  
73 married and how many children they have [4]. There have been substantial changes  
74 to the UK benefits system in the past two decades, specifically the introduction of  
75 “Universal Credit” (UC) which is a benefit provided for people who are out of work as  
76 well as for those who are in work but on a low income and require extra support. It

77 replaced 6 other benefits (Housing Benefit, Income Support, income-based  
78 Jobseeker’s Allowance, income-related Employment and Support Allowance, Child  
79 Tax Credit and Working Tax Credit). Although these are being phased out, some  
80 people still receive these benefits, known as “legacy benefits”, as they have not yet  
81 been transferred onto UC. UC was introduced as part of the *Welfare Reform Act*  
82 *2012*, in order to reduce the complexity of claiming various different benefits [5].  
83 Another key reform is the change over from Disability Living Allowance (DLA), a  
84 benefit for people who need support with mobility or care costs, to Personal  
85 Independence Payment (PIP). PIP is a non-means tested benefit, meaning a  
86 person’s income is not relevant to entitlement of receiving this benefit, and is  
87 similarly provided to help with extra costs due to having ill health or a disability,  
88 whether the claimant is in or out of work. Individuals are required to undergo a  
89 points-based assessment to determine how their condition impacts their functional  
90 ability [6].

91 Despite the notion that these reforms support the government’s drive to help people  
92 feel motivated to obtain and remain in employment [5], research indicates evidence  
93 of concern for those with mental disorders in particular as a result of these changes.  
94 Research has shown that people experience further distress and, therefore, a  
95 reduced likelihood of employment [6,7].

96

97 No UK-wide dataset currently provides combined individual level, routinely collected  
98 mental health service data and benefits data. It is vital that research into the  
99 provision and ongoing needs of people with a disability, long-term illness or mental  
100 disorder is carried out to inform policy on how best to support some of the most  
101 vulnerable members of society. This paper aimed to establish and describe a

102 working age cohort within a record-level linkage which provides an opportunity to  
103 better understand benefit receipt among those with mental disorders, the patterns of  
104 engagement with both National Health Service (NHS) secondary mental health  
105 services and the benefits system, and the impact of changes to the benefits system  
106 over the past two decades. We present sociodemographic characteristics and data  
107 on psychiatric diagnosis and benefit receipt among working age adults accessing  
108 secondary mental health care services and benefits in Southeast London.

109

110

#### 111 Ethics approval

112

113 The South London and Maudsley (SLaM) NHS Foundation Trust and Department for  
114 Work and Pensions (DWP) data linkage resulted in a linked data set of longitudinal  
115 data from SLaM electronic mental health records and DWP benefits data. All data  
116 used is de-identified. The use of SLaM mental health records data for research  
117 purposes received full ethical approval from the NHS Research Ethics Committee  
118 (Oxford South Central ref 18/SC/0372). Ethical approval for the data linkage was  
119 granted from the Oxford South Central REC (Ref: 22/SC/0400), and the data linkage  
120 was legally permitted by the Health Research Authority Confidentiality Group (CAG)  
121 under Section 251 of the NHS Act 2006 (ref 17/CAG/0055).

122 The Maudsley Biomedical Research Centre (BRC) data linkage service user and  
123 carer advisory group is a Patient and Public Involvement and Engagement (PPIE)  
124 group containing members with lived experience of mental disorders or caring for  
125 someone with a mental disorder who has accessed mental health services.

126 Members were involved in early discussions around the data linkage and were  
127 supportive of the linkage. In addition, two PPI members have joined our research

128 team and are regularly involved in discussions regarding projects using the linked  
129 data. Consultation and discussion with all PPI members will continue as work  
130 progresses [8].

131

132

## 133 **Cohort description**

134

135 Mental health data was extracted from the electronic health care records of the  
136 SLaM NHS Foundation Trust; one of Europe's largest providers of secondary mental  
137 health services, providing services to the South London boroughs of Lambeth,  
138 Lewisham, Southwark, and Croydon, covering a catchment area of over 1.3 million  
139 residents [9]. SLaM provides specialist secondary mental health services for a  
140 number of disorders, including eating disorders and psychosis related disorders, as  
141 well as outpatient services for low level common mental disorders (for example,  
142 Improving Access to Psychological Therapy (IAPT) services). Patients who accessed  
143 SLaM services vary in their level and method of contact with services, for example  
144 patients may have a one-off presentation or referral from a general practitioner (GP),  
145 or ongoing hospitalisations and treatment. Patients included in the current cohort are  
146 those who had accessed either SLaM secondary mental health services (some of  
147 whom will have also accessed IAPT services). Those who only accessed IAPT  
148 services were excluded from this cohort, as the focus was on patients who were  
149 likely to meet clinical thresholds for a mental disorder. The Maudsley Biomedical  
150 Research Centre (BRC) Clinical Records Interactive Search (CRIS) system was  
151 established to provide a service-user led governance framework, that could safely  
152 and securely de-identify clinical data from SLaM's electronic health records for

153 research purposes [10].

154 Benefits data comes from the DWP. DWP are responsible for policy implementation  
155 relating to most benefits in the United Kingdom. The linkage of the two datasets took  
156 place in 2020 using an ad hoc deterministic approach, achieving a linkage rate of  
157 92.3% [see Reference 11 for full details].

158

159 This profile paper reports on a cohort of patients of working age who accessed SLaM  
160 services between 1<sup>st</sup> January 2007 and 30<sup>th</sup> June 2019. We defined working age as  
161 those between the ages of 18-65 years, including those aged 18 years and above at  
162 SLaM window start date (January 2007) and those aged 65 years and below at  
163 SLaM window end date (June 2019) (Figure 1). This is because people in the UK  
164 turning age 66 years were eligible for State Pension and this was generally  
165 considered as the standard retirement age [12].

166 We report data on working age patients who had accessed SLaM (n=150,348) and  
167 some of them had received a benefit relating specifically to unemployment or work-  
168 related income, sickness or disability, or Housing Benefit, which are referred to as  
169 benefits of interest.

170

## 171 **Cohort timeline**

172

173 The linkage provides data covering a 15-year window, with benefits data starting  
174 from 1<sup>st</sup> January 2005 until 30<sup>th</sup> June 2020, and data from SLaM covering the period  
175 1<sup>st</sup> January 2007 until 30<sup>th</sup> June 2019. Due to the longitudinal and administrative  
176 nature of the linkage, data can exist for people, in relation to both mental health data  
177 and benefits data at multiple timepoints. For some, data on mental health and

178 benefits exist together throughout the period under study. For others, there may be  
179 only one instance for both mental health and benefits data. It should be noted that  
180 the CRIS data is 'live', so for each new project specific data extraction using the  
181 linked data, details can vary as the SLaM patient journey is ongoingly edited by  
182 health professionals.

183

## 184 **Cohort measures**

185 *Mental health electronic record data:* All patient level information within the CRIS  
186 system was pseudonymised, including structured fields and unstructured text from  
187 clinical notes. Data included individual level socio-demographic characteristics (e.g.,  
188 sex, month and year of birth, date of death, ethnicity, marital status, neighbourhood  
189 deprivation) and time variant clinical data such as psychiatric diagnosis,  
190 assessments, mental health treatment (medication and therapies), and engagement  
191 with SLaM services including admissions, recorded attendance, and adherence to  
192 treatments. Note that it is possible patients received different psychiatric diagnoses  
193 over time; the psychiatric diagnosis reported in the tables refers to the first instance  
194 of a psychiatric diagnosis received within the SLaM data window (January 2007-  
195 June 2019).

196 *Benefits data:* Socio-demographic data included sex, date of death and truncated  
197 postcode. Time variant data included dates of benefit receipt. The benefits data were  
198 derived from various benefits sources, for example, the "National Benefits Database"  
199 (NBD) contains certain benefit types, many of which were legacy benefits, whilst  
200 "Universal Credit" (UC) and "Personal Independence Payment" (PIP) was extracted  
201 from different administrative data sources. There were also separate benefit "flags"



202 for Pension Credit and Housing Benefit (HB) within the NBD database. NBD benefits  
203 include Incapacity Benefit (IB), Carer's Allowance, Income Support (IS), Jobseeker's  
204 Allowance (JSA), Attendance Allowance, Retirement/State Pension, Disability Living  
205 Allowance (DLA), Severe Disablement Benefit (SDA), Widow's Benefit, Passported  
206 Incapacity Benefit, Bereavement Benefit and Employment and Support Allowance  
207 (ESA). Data contained benefit spell dates and payment entitlements. A benefit spell  
208 indicated a period of time a person was receiving a benefit without a break. There  
209 was also information on work-related interventions provided by DWP, as well as  
210 work capability assessments (WCAs), which are used to determine someone's  
211 capacity for work and entitlement to ESA. The WCA was introduced as part of a  
212 wider benefit reform in 2008 [13].

213 For the purpose of this paper, we only examined benefits relating to unemployment  
214 or work-related income, sickness or disability, or HB, all of which may be relevant for  
215 working age adults who have accessed secondary care services for their mental  
216 health. These benefits of interest include UC, PIP, HB, IB, IS, JSA, DLA, SDA, and  
217 ESA. Although not an unemployment, work-related income, sickness or disability  
218 related benefit, HB was included in the benefits of interest, as this is a key benefit  
219 that is only received alongside another benefit and is crucial in providing a fuller  
220 picture of someone's benefits situation.

221 Table 1. presents key variables. This is not an exhaustive list of every specific  
222 benefit related variable in the benefits data, or all clinical variables held within the  
223 CRIS data.

224

225

226

227

228

229 Table 1. Key variables from SLaM mental health electronic record data and benefits

230 data from DWP.

---

Summary of key variables

**Mental health electronic record data**

**Benefits data**

| <i>Socio-demographic data</i>                          | <i>Mental health data</i>                                             | <i>Socio-demographic data</i>        | <i>Benefits data</i>                                    |
|--------------------------------------------------------|-----------------------------------------------------------------------|--------------------------------------|---------------------------------------------------------|
| Month and year of birth                                | <b>a</b> Psychiatric diagnosis based on ICD-10 codes                  | Sex                                  | <b>c</b> National Benefits Database                     |
| Sex                                                    | Dates of first and last contact with SLaM                             | Date of death                        | Universal Credit                                        |
| Ethnicity                                              | Medication – prescription, type, dosage)                              | Postcode truncated to district level | Personal Independence Payment                           |
| Date of death                                          | <b>b</b> Interventions (therapies – type and whether or not received) |                                      | Benefit spells start and end date                       |
| Deprivation (Indices of Multiple Deprivation quintile) | Inpatient admissions                                                  |                                      | <b>d</b> Work Capability Assessment date and outcome    |
|                                                        |                                                                       |                                      | Weekly monetary entitlement at start and end of benefit |
|                                                        |                                                                       |                                      | Date of payment                                         |
|                                                        |                                                                       |                                      | Work programme interventions                            |

---

231

232

233 **Note:**

234 **a** *Psychiatric diagnosis is based on the International Classification of Disease (ICD)*  
235 *version 10. b Interventions include various therapy types offered. Dates are attached*  
236 *to these, alongside if a patient did not attend and how many sessions were*  
237 *completed. c National Benefits Database includes information on the following*  
238 *benefits: Incapacity Benefit, Carer's Allowance, Income Support, Jobseeker's*  
239 *Allowance, Attendance Allowance, Retirement/State Pension, Disability Living*  
240 *Allowance, Severe Disablement Benefit, Widow's Benefit, Pension Credit,*  
241 *Passported Incapacity Benefit, Bereavement Benefit, Employment and Support*  
242 *Allowance. d Benefit spell start and end dates indicate a period of time a person was*  
243 *receiving a benefit without a break, not necessarily the date they first claimed a*  
244 *benefit.*

245

246 This data enables us to look at the on and off flows of benefit receipt and mental  
247 health utilisation among all patients. We can determine how long people are  
248 receiving a benefit(s) for, entitlement amounts, as well assessment dates and  
249 outcomes. Data on interventions from DWP provide information on a variety of  
250 different intervention types that have been offered to patients, including but not  
251 limited to "Skills for Work", "Job Search Support Centre" and "Job Club", as well as  
252 the start and end dates of when these opportunities have been provided and the  
253 "end reason" such as "Found Work".

254

## 255 **Findings to date**

256

257 We have reported initial findings on the linkage process between SLaM and DWP  
258 records and described the linkage process and sensitivity analysis exploring factors  
259 associated with linkage success between SLaM patients and their DWP records.  
260 [10]. Of the characteristics studied, female sex, ethnic minority status, being aged

261 between 21-60 years relative to other ages below or above, and not having a  
 262 recorded primary psychiatric diagnosis were associated with non-successful linkage  
 263 [11].

264 For this cohort profile report, we explored the socio-demographic and clinical  
 265 characteristics of working age adults who were either receiving or not receiving  
 266 benefits of interest. Of the 150,348 working age adults who were successfully linked,  
 267 78.3% received a benefit of interest (n=117,683). Of this group, 68.0% had a  
 268 recorded primary psychiatric diagnosis. Of those who either did not receive a benefit  
 269 at all or received a benefit that was not of interest (e.g., State Pension) (n=32,665),  
 270 58.1% had a recorded primary psychiatric diagnosis (Table 2).

271 It should be noted that the group of patients who were of working age but did not  
 272 receive a benefit of interest (n=32,665) included: those who had engaged with DWP  
 273 as evidenced by an entry in benefits records but did not receive any benefits  
 274 (n=273), those who had no entry in benefit records (n=31,538), and those who  
 275 engaged with DWP and received benefits that were not of interest (e.g. State  
 276 Pension) (n=854). Sensitivity analyses were conducted to assess any key  
 277 differences between these groups and showed no notable differences.

278

279 **Table 2: Socio-demographic characteristics of working age patients who have**  
 280 **received or not received a benefit related to unemployment, sickness,**  
 281 **disability, housing, or income support.**

|  | <b>Working age patients</b><br>N=150,348<br>(100.0%) | <b>a Received benefits of interest</b><br>n=117,683<br>(78.3%) | <b>Did not receive benefits of interest</b><br>n=32,665<br>(21.7%) |
|--|------------------------------------------------------|----------------------------------------------------------------|--------------------------------------------------------------------|
|  | n (%)                                                | n (%)                                                          | n (%)                                                              |

|                                                    |                |                |               |
|----------------------------------------------------|----------------|----------------|---------------|
| <b>Sex</b>                                         |                |                |               |
| Female                                             | 72,074 (48.0)  | 54,116 (46.0)  | 17,958 (55.0) |
| Male                                               | 78,171 (53.0)  | 63,490 (54.0)  | 14,681 (45.0) |
| <b>b Age (years)</b>                               |                |                |               |
| 18-24 years                                        | 12,443 (8.3)   | 8,491 (7.2)    | 3,952 (12.1)  |
| 25-34 years                                        | 36,735 (24.3)  | 28,556 (24.3)  | 8,179 (25.0)  |
| 35-44 years                                        | 37,480 (24.9)  | 28,202 (24.0)  | 9,278 (28.4)  |
| 45-54 years                                        | 35,432 (23.6)  | 28,701 (24.4)  | 6,731 (20.6)  |
| 55-65 years                                        | 28,258 (18.8)  | 23,733 (20.2)  | 4,525 (13.9)  |
| <b>Ethnicity</b>                                   |                |                |               |
| White British / White Other                        | 79,052 (52.6)  | 62,535 (53.1)  | 16,517 (50.6) |
| Black/African/Caribbean/Black British              | 21,022 (14.0)  | 18,614 (15.8)  | 2,408 (7.4)   |
| Asian/Asian British                                | 7,465 (5.0)    | 5,279 (4.5)    | 2,186 (6.7)   |
| Mixed/Multiple racial and ethnic groups            | 3,347 (2.2)    | 2,844 (2.4)    | 503 (1.5)     |
| Other racial and ethnic minority groups            | 9,539 (6.3)    | 6,934 (5.9)    | 2,605 (8.0)   |
| Not stated                                         | 29,923 (19.9)  | 21,477 (18.2)  | 8,446 (25.9)  |
| <b>Recorded death between 2005 - 2020</b>          |                |                |               |
| No                                                 | 138,835 (92.3) | 107,126 (91.0) | 31,709 (97.1) |
| Yes                                                | 11,513 (7.7)   | 10,557 (9.0)   | 956 (2.9)     |
| <b>c Deprivation (IMD quintile)</b>                |                |                |               |
| First (most deprived)                              | 32,266 (22.6)  | 27,760 (25.0)  | 4,506 (14.4)  |
| Second                                             | 55,016 (38.6)  | 43,985 (39.5)  | 11,031 (35.2) |
| Third                                              | 31,419 (22.0)  | 23,362 (21.0)  | 8,057 (25.7)  |
| Fourth                                             | 14,988 (10.5)  | 10,284 (9.2)   | 4,704 (15.3)  |
| Fifth (least deprived)                             | 8,860 (6.2)    | 5,859 (5.3)    | 3,001 (9.6)   |
| <b>d Resident within SLaM local catchment area</b> |                |                |               |
| No                                                 | 48,538 (34.0)  | 38,104 (34.2)  | 10,434 (33.3) |
| Yes                                                | 94,243 (66.0)  | 73,352 (65.8)  | 20,891 (66.7) |
| <b>Age (years) at first presentation to SLaM</b>   |                |                |               |
| <18 years                                          | 10,040 (6.9)   | 8,035 (7.0)    | 2,005 (6.3)   |
| 18-24 years                                        | 28,797 (19.6)  | 22,257 (19.4)  | 6,540 (20.6)  |
| 25-34 years                                        | 42,856 (29.2)  | 32,544 (28.3)  | 10,312 (32.5) |
| 35-44 years                                        | 36,338 (24.8)  | 28,896 (25.2)  | 7,442 (23.5)  |
| 45-54 years                                        | 22,762 (15.5)  | 18,542 (16.1)  | 4,220 (13.3)  |
| 55-65 years                                        | 5,841 (4.0)    | 4,632 (4.0)    | 1,209 (3.8)   |
| <b>d Psychiatric diagnosis received</b>            |                |                |               |
| Received primary psychiatric diagnosis             | 98,974 (65.8)  | 79,981 (68.0)  | 18,993 (58.1) |
| Did not receive primary psychiatric diagnosis      | 51,374 (34.2)  | 37,702 (32.0)  | 13,672 (41.9) |

282 **Note:**  
 283 **a** Benefits received: these include having received one or more of the following at  
 284 any point in the DWP data window (January 2005-June 2020): Universal Credit,  
 285 Personal Independence Payment, Housing Benefit, Incapacity Benefit, Income  
 286 Support, Jobseeker's Allowance, Disability Living Allowance, Severe Disablement

287 *Benefit, Employment and Support Allowance. Those in the ‘did not receive benefits’*  
288 *column will not have any instances of receiving the relevant benefits listed, but may*  
289 *have received other benefits (e.g., State Pension) or no benefits at all. **b** Age (years)*  
290 *represents the age at SLaM window end date (30<sup>th</sup> June 2019). All patients in this*  
291 *cohort are of working age between the SLaM window start and end date (18-65*  
292 *years). Not all n (%) will add to total (100%) due to missing data across variables*  
293 *(such as: gender). **c** Indices of Multiple Deprivation (IMD) is a summary measure of*  
294 *relative deprivation for fixed areas of the UK, informed by seven domains (income,*  
295 *employment, education, crime, housing, health, and living environment), scores are*  
296 *grouped into quintiles based on relative disadvantage **d** These measures are taken*  
297 *from the time point that is closest to the SLaM window start date (January 2007).*

298

299 Table 3 shows that a much higher percentage of patients aged over 24 received  
300 more than one benefit compared to those between 18-24 years. This result is likely a  
301 consequence of patients in older age brackets having a higher propensity to seek  
302 housing benefits. Moreover, belonging to an older age group may suggest an  
303 extended duration of benefit receipt, indicating a potential combination of receiving  
304 legacy and newer benefits, alongside an elevated need that contributes to a higher  
305 frequency of benefit claims.

306 A higher percentage of those within categories “White British” and “White Other”  
307 received more than one benefit (53.6%), relative to other ethnic groups. The  
308 distribution of ethnic groups corresponds to the demographic distribution in the  
309 relevant boroughs. People living in the first and second most deprived areas made  
310 up nearly 70% of claimants that had received more than one benefit. This indicates  
311 patients residing in more disadvantaged areas need additional support, highlighting  
312 the importance of further investigation into this particular group.

313 A much higher percentage of those with a primary psychiatric diagnosis received  
314 more than one benefit (69.4%) compared to those who had not received a primary  
315 psychiatric diagnosis (30.6%). This finding aligns with earlier reports, indicating that  
316 a prevalent working-age disability and common reason for claiming unemployment

317 and sickness-related benefits is a mental health disorder. Consequently, individuals  
318 with a formal psychiatric diagnosis within this group may be more likely to need and  
319 receive increased benefits.

320 **Table 3: Socio-demographics of working age patients receiving benefits related to unemployment, sickness, disability,**  
 321 **housing or income support.**

| Type of benefit          | Universal Credit (UC)<br>n(%) | Jobseeker's Allowance (JSA)<br>n(%) | Employment and Support Allowance (ESA)<br>n(%) | Incapacity Benefit (IB)<br>n(%) | Severe Disablement Allowance (SDA)<br>n(%) | Personal Independence Payment (PIP)<br>n(%) | Disability Living Allowance (DLA)<br>n(%) | Income Support (IS)<br>n(%) | Housing benefit (HB)<br>n(%) | Received more than one benefit of interest<br>n(%) |
|--------------------------|-------------------------------|-------------------------------------|------------------------------------------------|---------------------------------|--------------------------------------------|---------------------------------------------|-------------------------------------------|-----------------------------|------------------------------|----------------------------------------------------|
| <b>Sociodemographics</b> |                               |                                     |                                                |                                 |                                            |                                             |                                           |                             |                              |                                                    |
| <b>Sex</b>               |                               |                                     |                                                |                                 |                                            |                                             |                                           |                             |                              |                                                    |
| Female                   | 22,293<br>(53.8)              | 27,007<br>(41.5)                    | 31,105<br>(43.3)                               | 15,486<br>(39.8)                | 1,138<br>(44.2)                            | 19,221<br>(47.6)                            | 16,795<br>(43.4)                          | 27,003<br>(54.2)            | 34,897<br>(46.4)             | 44,949<br>(45.3)                                   |
| Male                     | 19,168<br>(46.2)              | 38,036<br>(58.5)                    | 40,737<br>(56.7)                               | 23,461<br>(60.2)                | 1,435<br>(55.8)                            | 21,126<br>(52.4)                            | 21,888<br>(56.6)                          | 22,815<br>(45.8)            | 40,292<br>(53.6)             | 54,383<br>(54.8)                                   |
| <b>Age (years)</b>       |                               |                                     |                                                |                                 |                                            |                                             |                                           |                             |                              |                                                    |
| 18-24 years              | 5,265<br>(12.7)               | 2,188 (3.4)                         | 2,832 (3.9)                                    | <10 (<0.1)                      | <10 (<0.1)                                 | 3,461 (8.6)                                 | 3,163 (8.2)                               | 971 (2.0)                   | 1,992 (2.7)                  | 5,775 (5.8)                                        |
| 25-34 years              | 12,99<br>(31.3)               | 20,553<br>(31.6)                    | 14,789<br>(20.6)                               | 3,146 (8.1)                     | <10 (<0.1)                                 | 7,724<br>(19.1)                             | 7,056<br>(18.2)                           | 8,571<br>(17.2)             | 15,547<br>(20.7)             | 22,900<br>(23.0)                                   |
| 35-44 years              | 10,324<br>(24.9)              | 17,960<br>(27.6)                    | 16,644<br>(23.2)                               | 9,186<br>(23.6)                 | 458 (17.)                                  | 8,414<br>(20.8)                             | 7,142<br>(18.5)                           | 12,631<br>(25.4)            | 19,597<br>(26.1)             | 23,884<br>(24.0)                                   |
| 45-54 years              | 8,261<br>(19.9)               | 14,691<br>(22.6)                    | 19,974<br>(27.8)                               | 13,529<br>(34.7)                | 963 (37.4)                                 | 10,706<br>(26.5)                            | 10,359<br>(26.8)                          | 15,174<br>(30.5)            | 21,275<br>(28.3)             | 25,575<br>(25.7)                                   |



|                                           |                  |                  |                  |                  |                 |                  |                  |                  |                  |                  |
|-------------------------------------------|------------------|------------------|------------------|------------------|-----------------|------------------|------------------|------------------|------------------|------------------|
| 55-65 years                               | 4,656<br>(11.2)  | 9,696<br>(14.9)  | 17,642<br>(24.5) | 13,087<br>(33.6) | 1,153<br>(44.8) | 10,064<br>(24.9) | 10,979<br>(28.4) | 12,482<br>(25.1) | 16,815<br>(22.4) | 21,258<br>(21.4) |
| <b>Ethnicity</b>                          |                  |                  |                  |                  |                 |                  |                  |                  |                  |                  |
| White British/<br>White Other             | 19,935<br>(48.0) | 33,992<br>(52.2) | 40,422<br>(56.2) | 23,396<br>(60.2) | 1,479<br>(57.5) | 21,769<br>(53.9) | 21,717<br>(56.1) | 27,261<br>(54.7) | 39,953<br>(53.1) | 53,227<br>(53.6) |
| Black/African/Caribbean/Black British     | 7,296<br>(17.6)  | 10,294<br>(15.8) | 11,963<br>(16.6) | 6,572<br>(16.9)  | 567 (22.0)      | 6,782<br>(16.8)  | 6,723<br>(17.4)  | 9,508<br>(19.1)  | 13,961<br>(18.6) | 16,807<br>(16.9) |
| Asian/Asian British                       | 1,926<br>(4.6)   | 2,682 (4.1)      | 3,040 (4.2)      | 1,577 (4.1)      | 116 (4.5)       | 1,746 (4.3)      | 1,702 (4.4)      | 2,011 (4.1)      | 3,059 (4.1)      | 4,253 (4.1)      |
| Mixed/Multiple racial and ethnic groups   | 1,218<br>(2.9)   | 1,638 (2.5)      | 1,748 (2.4)      | 859 (2.2)        | 64 (2.5)        | 1,024 (2.5)      | 933 (2.4)        | 1,338 (2.7)      | 1,903 (2.5)      | 2,473 (2.5)      |
| Other racial and ethnic minority groups   | 2,628<br>(6.3)   | 4,117 (6.3)      | 3,918 (5.5)      | 1,752 (4.5)      | 49 (1.9)        | 2,145 (5.3)      | 1,636 (4.2)      | 2,587 (5.2)      | 4,516 (6.0)      | 5,680 (5.5)      |
| Not stated                                | 8,499<br>(20.5)  | 12,365<br>(19.0) | 10,790<br>(15.0) | 4,794<br>(12.3)  | 299 (11.6)      | 6,903<br>(17.1)  | 5,988<br>(15.5)  | 7,124<br>(14.3)  | 11,834<br>(15.7) | 16,952<br>(17.1) |
| <b>Recorded death between 2005 - 2020</b> |                  |                  |                  |                  |                 |                  |                  |                  |                  |                  |
| No                                        | 40,365<br>(87.3) | 60,925<br>(93.6) | 64,638<br>(89.9) | 32,823<br>(84.3) | 2,065<br>(80.2) | 37,047<br>(91.8) | 33,294<br>(86.0) | 43,795<br>(87.9) | 67,512<br>(89.6) | 89,711<br>(90.3) |
| Yes                                       | 1,137<br>(2.7)   | 4,163 (6.4)      | 7,243<br>(10.1)  | 6,127<br>(15.7)  | 509 (19.8)      | 3,322 (8.2)      | 5,405<br>(14.0)  | 6,034<br>(12.1)  | 7,714<br>(10.3)  | 9,681 (9.7)      |
| <b>Deprivation (IMD quintile)</b>         |                  |                  |                  |                  |                 |                  |                  |                  |                  |                  |
| First (most deprived)                     | 10,381<br>(26.6) | 15,205<br>(24.9) | 17,901<br>(26.5) | 9,939<br>(27.3)  | 566 (23.2)      | 10,105<br>(26.5) | 9,843<br>(26.7)  | 13,552<br>(28.9) | 19,512<br>(27.7) | 24,590<br>(26.3) |
| Second                                    | 15,775<br>(40.5) | 24,775<br>(40.5) | 27,002<br>(40.0) | 15,083<br>(41.5) | 979 (40.1)      | 14,848<br>(38.9) | 14,238<br>(38.7) | 19,767<br>(42.1) | 29,790<br>(42.2) | 37,764<br>(40.3) |
| Third                                     | 7,940<br>(20.4)  | 12,849<br>(21.0) | 13,693<br>(20.3) | 7,249<br>(19.9)  | 575 (23.5)      | 7,775<br>(20.4)  | 7,358<br>(20.0)  | 9,135<br>(19.5)  | 13,945<br>(19.8) | 19,115<br>(20.4) |
| Fourth                                    | 3,266<br>(8.3)   | 5,418 (8.9)      | 5,741 (8.5)      | 2,694 (7.4)      | 221 (9.0)       | 3,434 (9.0)      | 3,356 (9.1)      | 3,113 (6.6)      | 4,966 (7.0)      | 7,907 (8.4)      |

|                                                  |               |               |               |               |              |               |               |               |               |               |
|--------------------------------------------------|---------------|---------------|---------------|---------------|--------------|---------------|---------------|---------------|---------------|---------------|
| Fifth (least deprived)                           | 1,634 (4.2)   | 2,862 (4.7)   | 3,168 (4.7)   | 1,393 (3.8)   | 103 (4.0)    | 1,994 (5.2)   | 2,026 (5.5)   | 1,408 (3.0)   | 2,320 (3.3)   | 4,306 (4.6)   |
| <b>Resident within local catchment area</b>      |               |               |               |               |              |               |               |               |               |               |
| No                                               | 11,687 (29.9) | 19,939 (32.6) | 24,608 (36.4) | 12,062 (33.1) | 692 (28.1)   | 15,059 (39.4) | 15,013 (40.6) | 14,082 (29.9) | 22,041 (31.2) | 31,936 (34.0) |
| Yes                                              | 27,350 (70.1) | 41,247 (67.1) | 43,049 (63.6) | 24,394 (66.9) | 1,767 (71.9) | 23,211 (60.7) | 21,929 (59.4) | 32,975 (70.1) | 48,588 (68.8) | 61,936 (66.0) |
| <b>Age (years) at first presentation to SLaM</b> |               |               |               |               |              |               |               |               |               |               |
| <18 years                                        | 4,101 (10.1)  | 3,337 (5.3)   | 3,670 (5.2)   | 387 (1.0)     | 13 (0.5)     | 3,104 (7.9)   | 3,526 (9.3)   | 1,951 (4.0)   | 3,196 (4.4)   | 6,380 (6.8)   |
| 18-24 years                                      | 9,994 (24.7)  | 13,349 (21.0) | 11,699 (16.6) | 3,943 (10.3)  | 101 (4.1)    | 6,816 (17.3)  | 7,001 (18.5)  | 7,575 (15.5)  | 11,725 (16.0) | 17,788 (18.3) |
| 25-34 years                                      | 12,144 (30.0) | 20,913 (32.9) | 18,839 (26.8) | 10,213 (26.8) | 657 (26.4)   | 9,548 (24.2)  | 8,660 (22.9)  | 13,898 (28.5) | 21,679 (29.5) | 27,208 (28.0) |
| 35-44 years                                      | 8,555 (21.1)  | 14,918 (23.5) | 19,458 (27.7) | 13,117 (34.4) | 988 (39.6)   | 10,127 (25.6) | 10,037 (26.6) | 14,770 (30.1) | 21,068 (28.7) | 25,447 (26.2) |
| 45-54 years                                      | 4,548 (11.2)  | 8,937 (14.1)  | 13,305 (18.9) | 8,601 (22.6)  | 602 (24.2)   | 7,581 (19.2)  | 6,993 (18.5)  | 8,795 (18.1)  | 12,949 (17.6) | 16,335 (16.8) |
| 55-65 years                                      | 1,153 (2.9)   | 2,162 (3.4)   | 3,348 (4.8)   | 1,861 (4.9)   | 132 (5.3)    | 2,300 (5.8)   | 1,538 (4.1)   | 1,744 (3.6)   | 2,913 (4.0)   | 3,932 (4.1)   |
| <b>3 Primary psychiatric diagnosis</b>           |               |               |               |               |              |               |               |               |               |               |
| Received primary psychiatric diagnosis           | 27,314 (65.8) | 42,680 (65.6) | 52,201 (72.6) | 28,975 (74.4) | 2,046 (79.5) | 29,615 (73.4) | 28,465 (73.6) | 35,822 (71.9) | 52,648 (67.0) | 68,989 (69.4) |
| Did not receive primary psychiatric diagnosis    | 14,188 (34.2) | 22,408 (34.4) | 19,680 (27.4) | 9,975 (25.6)  | 528 (20.5)   | 10,754 (26.6) | 10,234 (26.5) | 14,007 (28.1) | 22,57 (30.0)  | 30,403 (30.6) |

322 **Note:**  
323 **a** Age years represents the age at SLaM window end date (30<sup>th</sup> June 2019). All patients in this cohort are of working age between  
324 the SLaM window start and end date (18-65 years). Not all n (%) will add to total (100%) due to missing data across variables. **b**  
325 These measures are taken from the time point that is closest to the SLaM window start date (January 2007). **c** Indices of Multiple  
326 Deprivation (IMD) is a summary measure of relative deprivation for fixed areas of the UK, informed by seven domains (income,  
327 employment, education, crime, housing, health, and living environment), scores are grouped into quintiles based on relative  
328 disadvantage. Cell sizes of less than <10 are shown as <10 (<0.1%).

329

330

331

332 Of patients receiving a benefit of interest with a recorded primary psychiatric  
 333 diagnosis, the most common diagnoses were alcohol related disorders (F10) and  
 334 substance related disorders (F11-F19) (17.2%), followed by mood (affective)  
 335 disorders (F30-F39) (16.5%), in particular a single episode of major depressive  
 336 disorder (F32), and those with anxiety, dissociative, stress-related, somatoform and  
 337 other nonpsychotic mental disorders (F40-F48) (12.6%) (Table 4).

338

339 **Table 4: Diagnostic categories of working age patients who have received or**  
 340 **not received a benefit related to unemployment, sickness, disability, housing,**  
 341 **or income support.**

| Benefit receipt                                                                            | Received benefits of interest<br>n=117,683                                                                                                            |
|--------------------------------------------------------------------------------------------|-------------------------------------------------------------------------------------------------------------------------------------------------------|
| Recorded first primary psychiatric diagnoses (ICD-10 codes and description)                | n (%)                                                                                                                                                 |
|                                                                                            | <b>Schizophrenia, schizotypal, delusional disorders, and other non-mood psychotic disorders (F20-F29)</b><br><br><i>Total n = 10,586/117,683 (9%)</i> |
| Schizophrenia (F20)                                                                        | 5,752 (54.3)                                                                                                                                          |
| All other psychosis (e.g., unspecified nonorganic psychosis) (F21-F29)                     | 4,834 (45.7)                                                                                                                                          |
| <b>Mood (affective) disorders (F30-F39)</b><br><br><i>Total n = 19,401/117,683 (16.5%)</i> | Major depressive disorder, single episode (F32)                                                                                                       |
|                                                                                            | 12,058 (62.2)                                                                                                                                         |
|                                                                                            | All other mood affective disorders including bipolar (F30, F31, F33, F34, F38, F39)                                                                   |
|                                                                                            | 7,343 (37.8)                                                                                                                                          |

|                                                                                                                                                                                                                                                                             |               |
|-----------------------------------------------------------------------------------------------------------------------------------------------------------------------------------------------------------------------------------------------------------------------------|---------------|
| <b>Anxiety, dissociative, stress-related, somatoform and other nonpsychotic mental disorders (F40-F48)</b><br><i>Total n = 14,838/117,683 (12.6%)</i>                                                                                                                       |               |
| Reaction to severe stress, and adjustment disorders (F43)                                                                                                                                                                                                                   | 6,110 (41.2)  |
| Phobic anxiety disorders (F40), obsessive compulsive disorders (F42), dissociative and conversion disorders (F44), somatoform disorders (F45), Other non-psychotic mental disorders (F48)                                                                                   | 4,808 (32.4)  |
| Other anxiety disorders (F41) (e.g., panic disorders, generalised anxiety disorders, mixed anxiety, and depressive disorders)                                                                                                                                               | 3,920 (26.4)  |
| <b>Mental and behavioural disorders due to psychoactive substance use (F10-F19)</b><br><i>Total n = 20,095 /117,683 (17.1%)</i>                                                                                                                                             |               |
| Alcohol related disorders (F10)                                                                                                                                                                                                                                             | 8,991 (44.4)  |
| Substance related disorders (F11-F19)                                                                                                                                                                                                                                       | 11,104 (55.6) |
| <b>Behavioural syndromes associated with physiological disturbances and physical factors F50-F59</b><br><i>Total n = 2,482 /117,683 (2.1%)</i>                                                                                                                              |               |
| Eating disorders (F50) and all other behavioural syndromes (F51, F53, F54, F55, F59)                                                                                                                                                                                        | 2,482 (100.0) |
| <b>Disorders of adult personality and behaviour (F60-F63)</b><br><i>Total n = 2,856 /117,683 (2.4%)</i>                                                                                                                                                                     |               |
| Personality disorders and adult behavioural disorders (F60-F63)                                                                                                                                                                                                             | 2,856 (100.0) |
| <b>Other disorders - intellectual disabilities (F70-F79), pervasive and specific developmental disorders (F80-F89), and behavioural and emotional disorders with onset usually occurring in childhood and adolescence (F90-F98)</b><br><i>Total n = 9723/117,683 (8.3%)</i> |               |
| Intellectual disabilities (F70-F79)                                                                                                                                                                                                                                         | 1,851 (19.0)  |

|                                                                                              |                |
|----------------------------------------------------------------------------------------------|----------------|
| Autism and Asperger's related development disorders (F84)                                    | 2,385 (24.5)   |
| ADHD related disorders (F90)                                                                 | 4,089 (42.1)   |
| Other disorders (F80, F81, F83, F88, F89, F91, F92, F93, F94, F95, F98)                      | 1,398 (14.4)   |
| <b>No recorded primary psychiatric diagnosis</b><br><i>Total n = 37,702 /117,683 (32.0%)</i> | 37,702 (100.0) |

342

343

344

**Note:**

345 *Benefits of interest include having received one or more of the following at any point*  
346 *in the DWP data window (January 2005-June 2020): Universal Credit, Personal*  
347 *Independence Payment, Housing Benefit, Incapacity Benefit, Income Support,*  
348 *Jobseeker's Allowance, Disability Living Allowance, Severe Disablement Benefit,*  
349 *Employment and Support Allowance. All patients in this cohort are of working age*  
350 *between the SLaM window start and end date (18-65 years). The following*  
351 *diagnostic categories were excluded as they were not of interest for the purpose of*  
352 *this study and/or had very small numbers: F01 to F09: Mental disorders due to*  
353 *known physiological conditions, F52 Sexual dysfunction not due to a substance or*  
354 *known physiological condition, F64 Gender identity disorders, F65 Paraphilias, F66*  
355 *Other sexual disorders, F68 Other disorders of adult personality and behaviour, F69*  
356 *Unspecified disorder of adult personality and behaviour. If a patient received a first*  
357 *psychiatric diagnosis of FXX or F99, the next F\* code diagnosis they received*  
358 *closest to window start date of the SLaM data window is considered their first*  
359 *psychiatric diagnosis.*

360

361

362 Future research using the linked data will explore both the level of interaction with  
363 secondary mental health services and the duration of benefits received over time  
364 across different groups (e.g., across diagnostic groups and by socio-demographic  
365 factors), as well as assessing temporality between receiving a mental health  
366 diagnosis or accessing secondary mental health services and receiving a benefit.  
367 The data linkage also presents opportunities to look at the impact of the benefit  
368 reforms on mental health outcomes (e.g., mental health severity and diagnosis over  
369 time).

370

## 371 **Strengths and limitations**

372

373 This data linkage is the first of its kind to link electronic mental health records with  
374 benefits data in the UK, providing in depth data spanning a 15-year window and  
375 opportunity to explore the complex longitudinal relationships between benefit receipt  
376 among a substantial number of adults accessing secondary mental health across  
377 areas of Southeast London. The mental health data provides rich clinical information  
378 on psychiatric diagnoses, illness severity, assessment, history of appointments and  
379 treatments and interventions received. Benefits data provides substantial data such  
380 as type, level, dates of and entitlement amounts of benefits received, WCAs and  
381 work-related interventions offered.

382 Previous research reporting on mental health and benefit receipt has been limited in  
383 detail, as well as the methods used. The Adult Psychiatric Morbidity Survey (APMS)  
384 (2014) [14] reported that mental disorders are more common among those who were  
385 unemployed and receiving an out of work benefit, namely ESA, due to poor health  
386 and disability. The current data linkage presents extensive data recorded by health  
387 service professionals, as opposed to self-report, and provides more detailed benefits  
388 related information. Unlike cross-sectional studies, the longitudinal nature of the  
389 linkage presents an opportunity to understand ongoing changes and potential  
390 challenges in the provision of mental health services and benefits, as well as capture  
391 individuals using mental health services more sporadically.

392 Although we reported a high linkage rate (92.3%), we previously described a linkage  
393 bias showing certain characteristics such as age, gender, and ethnicity were  
394 associated with an increased risk of not being successfully linked [11]. Another

395 limitation is that our sample only contains patients who have been referred to SLaM,  
396 meaning we cannot compare our findings to a population with mental health  
397 disorders who have not accessed secondary mental health services. Further, we do  
398 not hold reliable data across the cohort specifically indicating whether a patient is  
399 currently in or out of work, though there are indicators among those receiving UC as  
400 to whether someone is currently in, out of, or looking for work.

401 This data linkage provides an opportunity to gain extensive knowledge around  
402 complex relationships between benefit receipt and mental health as well as provide  
403 evidence to support and answer areas of research interest stated by the DWP  
404 relating to health and disability and welfare provision [2,15], and around mental  
405 health provision. Future work will initially look at temporality of benefit receipt and  
406 mental health diagnosis, as well as the amount and type of interaction patients have  
407 with mental health services and the benefits system.

408

#### 409 **Data access**

410 The linked data is not freely available due to ethical and legal restrictions that exist  
411 for the current data linkage to ensure the privacy of patients. The team welcomes  
412 research enquiries for project proposals and collaboration. Those who are interested  
413 should contact the study lead, Dr Sharon Stevelink ([Sharon.stevelink@kcl.ac.uk](mailto:Sharon.stevelink@kcl.ac.uk))  
414 who will advise on the practicality, processes and required permissions for using the  
415 data linkage.

#### 416 **Author contributions**

417 AP, SAMS and NTF conceptualised the design of this cohort profile study. MH, JD,  
418 NTF, SD and SAMS were part of initial discussions, the various processes and then



419 finalization of the data linkage itself. MB, RL and AJ took lead in data curation. AP  
420 led on project administration and analysis, wrote initial draft of the paper including all  
421 sections and revised the paper. SAMS, NTF, MH and SD provided supervision and  
422 supported on drafts of the paper. RL provided data cleaning and statistical support.  
423 AP and SAMS acquired funding for the study with support from NTF and MH. All  
424 authors commented on final draft of the paper. NTF and SAMS are joint last authors.

#### 425 **Conflict of interest**

426 MH is principal investigator of the RADAR-CNS consortium, a public private pre-  
427 competitive consortium on mobile health, and as such received research funding to  
428 his university from five pharmaceutical companies (Janssen, UCB, MSD, Lundbeck  
429 and Biogen).

#### 430 **Patient and public involvement statement**

431 This project was informed by discussions with the NIHR Maudsley BRC Data  
432 Linkage Service User and Carer Advisory Group.

#### 433 **Patient consent for publication**

434 Not required.

#### 435 **Acknowledgements**

436 We would like to thank Megan Pritchard at the National Institute for Health and Care  
437 Research (NIHR) Maudsley Biomedical Research Centre (BRC) for their support  
438 with this study. We would also like to thank the members of the NIHR Maudsley BRC  
439 Data Linkage Service User and Carer Advisory Group for their input. We are very  
440 grateful to the DWP/Department of Health and Social Care joint Work and Health  
441 Directorate staff, who supported us in creating this linked dataset and for all the  
442 advice provided.

## 443 **References**

- 444 1. Department for Work and Pensions. Work, Health and Disability Green Paper  
445 Data Pack. 2016.  
446 [https://assets.publishing.service.gov.uk/government/uploads/system/uploads/  
447 attachment\\_data/file/644090/work-health-and-disability-green-paper-data-  
448 pack.pdf](https://assets.publishing.service.gov.uk/government/uploads/system/uploads/attachment_data/file/644090/work-health-and-disability-green-paper-data-pack.pdf) (March 2023, date last accessed).
- 449 2. Department for Work and Pensions. Sharping future support: the health and  
450 disability green paper. August 2021.  
451 [https://www.gov.uk/government/consultations/shaping-future-support-the-  
452 health-and-disability-green-paper](https://www.gov.uk/government/consultations/shaping-future-support-the-health-and-disability-green-paper) (March 2023, date last accessed).
- 453 3. Department for Work and Pensions. Benefits and financial support if you're  
454 temporarily unable to work. [https://www.gov.uk/browse/benefits/unable-to-  
455 work](https://www.gov.uk/browse/benefits/unable-to-work) (March 2023, date last accessed).
- 456 4. Department for Work and Pensions. Universal Credit.  
457 <https://www.gov.uk/universal-credit/what-youll-get>. (March 2023, date last  
458 accessed).
- 459 5. Department for Work and Pensions. From Welfare state to welfare system.  
460 November 2016. [https://www.gov.uk/government/speeches/from-welfare-  
461 state-to-welfare-system](https://www.gov.uk/government/speeches/from-welfare-state-to-welfare-system) (March 2023, date last accessed).
- 462 6. Dwyer P, Scullion L, Jones K, McNeill J, Stewart AB. Work, welfare, and  
463 wellbeing: The impacts of welfare conditionality on people with mental health  
464 impairments in the UK. *Social Policy & Administration*. 2020 Mar;54(2):311-  
465 26.
- 466 7. Wickham S, Bentley L, Rose T, Whitehead M, Taylor-Robinson D, Barr B.  
467 Effects on mental health of a UK welfare reform, Universal Credit: a

- 468 longitudinal controlled study. *The Lancet Public Health*. 2020 Mar 1;5(3):e157-  
469 64.
- 470 8. Jewell A, Pritchard M, Barrett K, Green P, Markham S, McKenzie S, Oliver R,  
471 Wan M, Downs J, Stewart R. The Maudsley Biomedical Research Centre  
472 (BRC) data linkage service user and carer advisory group: creating and  
473 sustaining a successful patient and public involvement group to guide  
474 research in a complex area. *Research involvement and engagement*. 2019  
475 Dec;5(1):1-0.
- 476 9. NHS South London and Maudsley NHS Foundation Trust. Who we are.  
477 <https://slam.nhs.uk/about> (March 2023, date last accessed).
- 478 10. Stewart R, Soremekun M, Perera G, Broadbent M, Callard F, Denis M, Hotopf  
479 M, Thornicroft G, Lovestone S. The South London and Maudsley NHS  
480 foundation trust biomedical research centre (SLAM BRC) case register:  
481 development and descriptive data. *BMC psychiatry*. 2009 Dec;9(1):1-2.
- 482 11. Stevelink SA, Phillips A, Broadbent M, Boyd A, Dorrington S, Jewell A, Leal R,  
483 Bakolis I, Madan I, Hotopf M, Fear NT. Linking electronic mental health and  
484 benefits records in South London: design, procedure and descriptive  
485 outcomes. *BMJ Open*. 2023 Feb 1;13(2):e067136.
- 486 12. Department for Work and Pensions. State Pension age timetable. May 2014.  
487 [https://www.gov.uk/government/publications/state-pension-age-timetable/state-](https://www.gov.uk/government/publications/state-pension-age-timetable/state-pension-age-timetable)  
488 [pension-age-timetable](https://www.gov.uk/government/publications/state-pension-age-timetable/state-pension-age-timetable) (April 2023, date last accessed).
- 489 13. Kennedy S. The Work Capability Assessment for Employment and Support  
490 Allowance. November 2012.  
491 <https://researchbriefings.files.parliament.uk/documents/SN05850/SN05850.pdf>  
492 f (March 2023, date last accessed).

- 493 14. McManus S, Bebbington PE, Jenkins R, Brugha T. Mental health and  
494 wellbeing in England: the adult psychiatric morbidity survey 2014. NHS  
495 Digital; 2016.
- 496 15. Department for Work and Pensions. DWP Areas of Research Interest. March  
497 2019. [https://www.gov.uk/government/publications/dwp-areas-of-research-](https://www.gov.uk/government/publications/dwp-areas-of-research-interest-2019)  
498 [interest-2019](https://www.gov.uk/government/publications/dwp-areas-of-research-interest-2019) (March 2023, date last accessed).
